# Supplementary material for: SERS combined with PCR as a potent tool for detecting mutations: a case study of tomato plants
Source: Royal Society of Chemistry journal article supplement (doi:10.1039/d2ra06044b), 2022-01-01
Supplement: d2ra06044b1.pdf [file d2ra06044b1.pdf]

# SERS combined with PCR as a potent tool for detecting mutations: A case study of tomato plants

*Samyabrata Sen,<sup>1,2,†</sup> Divya Chalapathi,<sup>1,2,†</sup> Jayaprakash Targolli,<sup>3</sup> Chandrabhas Narayana<sup>1,2\*</sup>*

<sup>1</sup> Chemistry and Physics of Materials Unit, <sup>2</sup> School of Advanced Materials, Jawaharlal Nehru  
Centre for Advanced Scientific Research, Bengaluru, India

<sup>3</sup> Biodecipher, Bengaluru, India

†Shared equal first authorship

\*Corresponding authors

Email address for correspondence: [cbhas@jncasr.ac.in](mailto:cbhas@jncasr.ac.in)

# Supporting Information

## **RNA Silencing:**

RNA silencing, in plants, utilizes the help of Dicer-like proteins (DCL). During this process, a small molecule of RNA is produced (sRNA) which binds with the DCL proteins to form the RNA-induced silencing complex (RISC). This complex is responsible for the inhibition of viral protein formation by interacting with the viral messenger RNA (mRNA).<sup>1</sup> In the case of TYLCV, plants carrying the genes required for resistance, if challenged by the virus show low levels of viral replication and spread of infection with moderate or no visual symptoms.<sup>2</sup> The genes responsible for this are the Ty1 and Ty-3 genes. These are alleles of the same gene and code for RNA-dependent RNA polymerases from a class of functionally unknown RDR genes, which are thought to be involved with the RNA silencing.<sup>3</sup>

## **Materials and Methods:**

### 1X Phosphate Buffer Saline:

137 mM NaCl, 2.7 mM KCl, 4.3 mM Na<sub>2</sub>HPO<sub>4</sub>, 1.47 mM KH<sub>2</sub>PO<sub>4</sub>

### Mastermix:

This Master Mix consists of AmpliTaq Gold™ DNA Polymerase UP (Ultra-Pure), dNTPs, MgCl<sub>2</sub>, and other essential components necessary for PCR.

## Sequence definitions for PCR-SERS:

### Tomato Indel sequence for Ty-3 gene

Indel marker: **With insertion** **CCTTCTTGTATA** (Resistant type)

TTTATATAAGGAAATAATAAATTCAATATGAAAAAGATTTACATTTGACCAGAAA  
TAGTTCAAATAATCAATACTTTAATTTTTTTAAGGAAAAAATAAATTTAAATAAA  
GTAAAAAATCAAGACAATACCTAAAAATATATCTACATTTTTCAAATTAATAAA  
TAATAATTTAAATATAAAATATATGAAAAACAATTTAAACATGTTTTTGACAAGA  
TTCCCTTAAACCTATCCTCAGTGTTTCGGTCAAAAAGTATGACTTCACTTGTACGG  
CATTTAACATGCAATAGTGTAGTTACTACTACCGCACTAGTTCTGTTTTCTCCCA  
AAACTCATTATTTAATTTTTCTTCTTTAACAAAGTTGACGAGACAAAAGCAAAAGT  
ATGAAGAATTTAATATCTTTTTTCCACTTTCTTTACCAATGTCTTAAAAACCAGGA  
AAGTAAATGATTTCTTGTTTAAAAGTGTGATCACTCTTTTTTTGCTGGTTTGTTCA  
AGTATATACAGGAAAAATGGGTGATCCGTTGATTGAAGAAATTGATGTT**CCTTCT**  
**TGTATA**CTGGATGCACCTTTACCATATTCTGTAGAGACGATGCTTGATAGAATCT  
GCAAGGAGCAGGGGCAAAAACCACCGTGTACTGGCATTAGAAGGAGGCTGAGC  
TCTATTGGTGAAAAAGGGTCATTAGAAATGCTCAAAATAATATCACGTCGTCCTA  
TCAAGAAGAGTCTCTCTGCTTTTCTTGTTTACATGATTGATCGCTACCCGGATTGT  
CTCTCCTCTTCTCTAGCCCCTTCAATTGTCTACTCAAACGCTCTTCTTCCCCTCGT  
CTCTTTCCATCTCCAGGTAATTTTTCCCCTAATTTTAATTCCTTTTTCTATAATG  
TTTGTGTACACAAAGTCTTTTCGCCAAAAACATGTTACATTCTAAAAATAACACAA  
AACCTATTTTTTGTATGTGTGTTTAGCGTGAAAAATAAGTATATTATGTTTGGT  
AGGTGAATATTTTTTCAATTCTTTTTAATGTTTGATTTATGAAAAAATAATTTTTTT  
AAAAATATCTTTTATATAATTTTTGAATTGCAATTGAGAATATTTTTTAAAAATAAA  
CAAAATTTTTCTTAGAAGAAAAAATAAAAAATAAGTTGATTTGGAAAATATTTT  
ATCTATATAACATGGGAAAATTGAAAAATATTTTTTCAAAAAATGT

**Without insertion** (Susceptible type)

TTTATATAAGGAAATAATAAATTCAATATGAAAAAGATTTACATTTGACCAGAAA  
TAGTTCAAATAATCAATACTTTAATTTTTTTAAGGAAAAAATAAATTTAAATAAA  
GTAAAAAATCAAGACAATACCTAAAAATATATCTACATTTTTCAAATTAATAAA  
TAATAATTTAAATATAAAATATATGAAAAACAATTTAAACATGTTTTTGACAAGA  
TTCCCTTAAACCTATCCTCAGTGTTTCGGTCAAAAAGTATGACTTCACTTGTACGG  
CATTTAACATGCAATAGTGTAGTTACTACTACCGCACTAGTTCTGTTTTCTCCCA  
AAACTCATTATTTAATTTTTCTTCTTTAACAAAGTTGACGAGACAAAAGCAAAAGT  
ATGAAGAATTTAATATCTTTTTTCCACTTTCTTTACCAATGTCTTAAAAACCAGGA  
AAGTAAATGATTTCTTGTTTAAAAGTGTGATCACTCTTTTTTTGCTGGTTTGTTCA  
AGTATATACAGGAAAAATGGGTGATCCGTTGATTGAAGAAATTGATGTTCTGGAT  
GCACCTTTACCATATTCTGTAGAGACGATGCTTGATAGAATCTGCAAGGAGCAGG  
GGCAAAAACCACCGTGTACTGGCATTAGAAGGAGGCTGAGCTCTATTGGTGAAA  
AAGGGTCATTAGAAATGCTCAAAATAATATCACGTCGTCCTATCAAGAAGAGTC  
TCTCTGCTTTTTCTTGTTTACATGATTGATCGCTACCCGGATTGTCTCTCCTCTTCT  
CTAGCCCCTTCAATTGTCTACTCAAACGCTCTTCTTCCCCTCGTCTCTTTCCATCTC  
CAGGTAATTTTTCCCCTAATTTTAATTCCTTTTTCTATAATGTTTGTGTACACAA  
AGTCTTTTCGCCAAAAACATGTTACATTCTAAAAATAACACAAAACCTATTTTTTG

TTATGTGTGTTTAGCGTGAAAAAATAAGTATATTATGTTTGGTAGGTGAATATTTT  
TTCAATTCCTTTTAATGTTTGATTTATGAAAAAATATTTTTTTAAAAATATCTTTT  
ATATAATTTTTGAATTGCAATTGAGAATATTTTTTAAAAATAAACAAAATTTTTCTT  
AGAAGAAAAAATAAAAAATAAGTTGATTTGGAAAAATATTTTATCTATATAAAC  
ATGGGAAAATTGAAAAATATTTTTCAAAAAATGT

[*Solanum lycopersicum* chromosome ch06, complete genome

NCBI Sequence ID: HG975518.1 Range 1: 30879605 to 30880804]

Forward primer 1 (without tail): GATTGAAGAAATTGATGTTCCCTTCTGTATA  
(Approximate product length with reverse primer = 101 bp)

Forward primer 2 (without tail): CGTTGATTGAAGAAATTGATGTTCTGGATG  
(Approximate product length with reverse primer = 93 bp)

Common (reverse) primer: GTTTTTGCCCCTGCTCCTTG

**Mi-indel:** Susceptible lines have 56bp insertion as indicated by color

TATTTTACTAACGTCGTCCTACTTAATAGTTCCGTCGGGGCTTTGATGAAACAAATT  
GTAGACATCTTTTTAGAACAGTAAAAGGTGTAAGAACCCTGCCAATTTGTTTGACA  
CTTCTATGTATGAAGACTCTGGAGATTTGGACGTGAAGTGCACATTTCTCCGCT  
CAAATTTTGCCAGAATATCCAAAATTTTAGAAACTCCAAATACTTGTTTTTATA  
ATTTAACTTTGTACACTTACAAAAGAAATTCAACATTTTTTCCAAGTTATATTTAT  
TCTTTCTAGGCATAGTACATTAATAATGACATTTAGCTTGACTTCAGTGGATAACT  
GTGACCTTAACTTTGCT

[*Solanum lycopersicum* chromosome ch06, complete genome

NCBI Sequence ID: HG975518.1 Range 1: 2322674 to 2323023]

Forward primer 1 (without tail) (susceptible)- GGACGTGAAGTGCACATTTT  
(Approximate product length with reverse primer = 70 bp)

Forward primer 2 (without tail) (resistant)- CAATTTGTTTGACACTTTCTCCGC  
(Approximate product length with reverse primer = 60 bp)

Common (reverse) primer: GTTTCTAAAATTTTGGGAATATTCTGGC

## Tomato SNP: Tomato Ty-3 gene alleles

Allele 1 – **C** nucleotide (resistant allele)

Allele2- **T** nucleotide (susceptible allele)

AGTAAATTCCTTTCATGGGAACAAAGTTGGAAAATGACAATCTCTTGCAATT  
CATATTTGATGCTTCAGGGAGAGAGATGTGTGCCAAACTTAGTCGGCATTTTA  
CTCAATGCTAAACTTTGACATTCTATGTGCATTTCACTCCCTAATTCTTAGGCT  
TTTTCTCTTGAAGTCATAGACCAAATAAGGCATATCTGTCCAAGAATTTAATC  
TCTCTGCTGAGCTACGGAGGAGTCCATAAAGAATACTTTATGGAACCTTTGG  
GAAGTGCCTGGAAGAGACGAAACAAGTATATTTGAGGAAACGTGCAGCTC  
TAAAAGGTAACAGCAGAATCAGATACTCCTATTGCATTTATATTCTTATGCTG  
ATAAGTCTTGTAACATAACCATGGAATCACCCATACTGCAACCTTATATTCTT  
TAGTGTCTTTTGTCTGTAATATTTAACTCCTCAGTCATAGAAAGGTAGGGAG  
GAATAAGTGTCCAATTATTTCTATTACTATCTCTCATTTAATTTGTGAAACCTG  
TCAGAACTTGTTTGCTGAGTCATTTCTTCAACTCTTCAAATAGTTGCTATCAA  
CTATAGAGAAATGGATGATGAATGTCTAACAGCAAGGATGATATCGTCTGGG  
ATACCTCTCAATGAACCTCATCTCCATG[C/T]TCGCTTGTCTAGGCTTGCAAAG  
ATTGAAAGAACTAAGCTTAGAGGAGGAAAGCTTCTATAAGTGACAGTTTTT  
ATCTTATGGGAACAGCTGACCCCACTGGTGTACTGGAAAGCAATGAAGTCTG  
TGTTATTCTGTAAGTAGACTGAAAATCATTTTCTGTACAAGCGTTTGGAGCTT  
TTATATGTTTTTTATATTCTGTGTTTCGAGAGATAAGTAACTGTTTCTTTCAATG  
GCAACTGACGGATATTTATAGTTTGACCTGCTATCTGACCCCTCCTATTCT  
GAGGATCTATATTTCAACAGGATGCATTGCCTTTTTGCATTCTAGATGTGTG  
GCTTAACTGTTACTTGACAATAATAGTGACCCAAGGAAATCATGATGTTTAC  
AAGCAAATAAATTCCTATTTACCAATGTATTTTTGTTTGTGCTTCCATCTAT  
GACTTTTTTCTGTCTGCCTTCATATTTCTGCCAATGTGTAGCAACTTTAAATT  
CTTTGTTTTGTAAGTTTTAACAATGATAATTGATAACAGAGGAGAGATGCTGA  
AAATGACATTTACAATTATTTGAAATTATATCAAGCTAAGGTTTTCTTCCAAA  
GAGAATTTAAGCTTTTAAACATGATAATTAGTT

[*Solanum lycopersicum* chromosome ch06, complete genome  
Sequence ID: HG975518.1 Range 1: 30854708 to 30856007]

Forward primer 1 (without tail): CTCAATGAACCTCATCTCCAGGC

Forward primer 2 (without tail): CTCAATGAACCTCATCTCCAGGT

Common (reverse) primer: AGATAAAAAGTCACTTATAGGAAGCT

Approximate product length: 102 bp

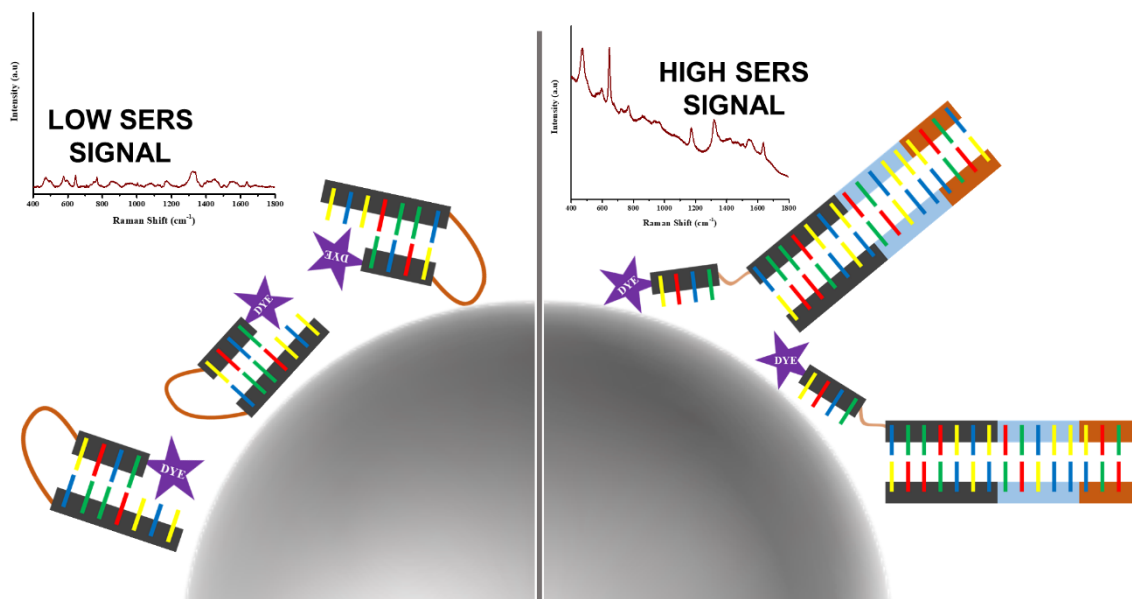

**Fig. S1.** Schematic representation of the functioning of a unimolecular DNA probe

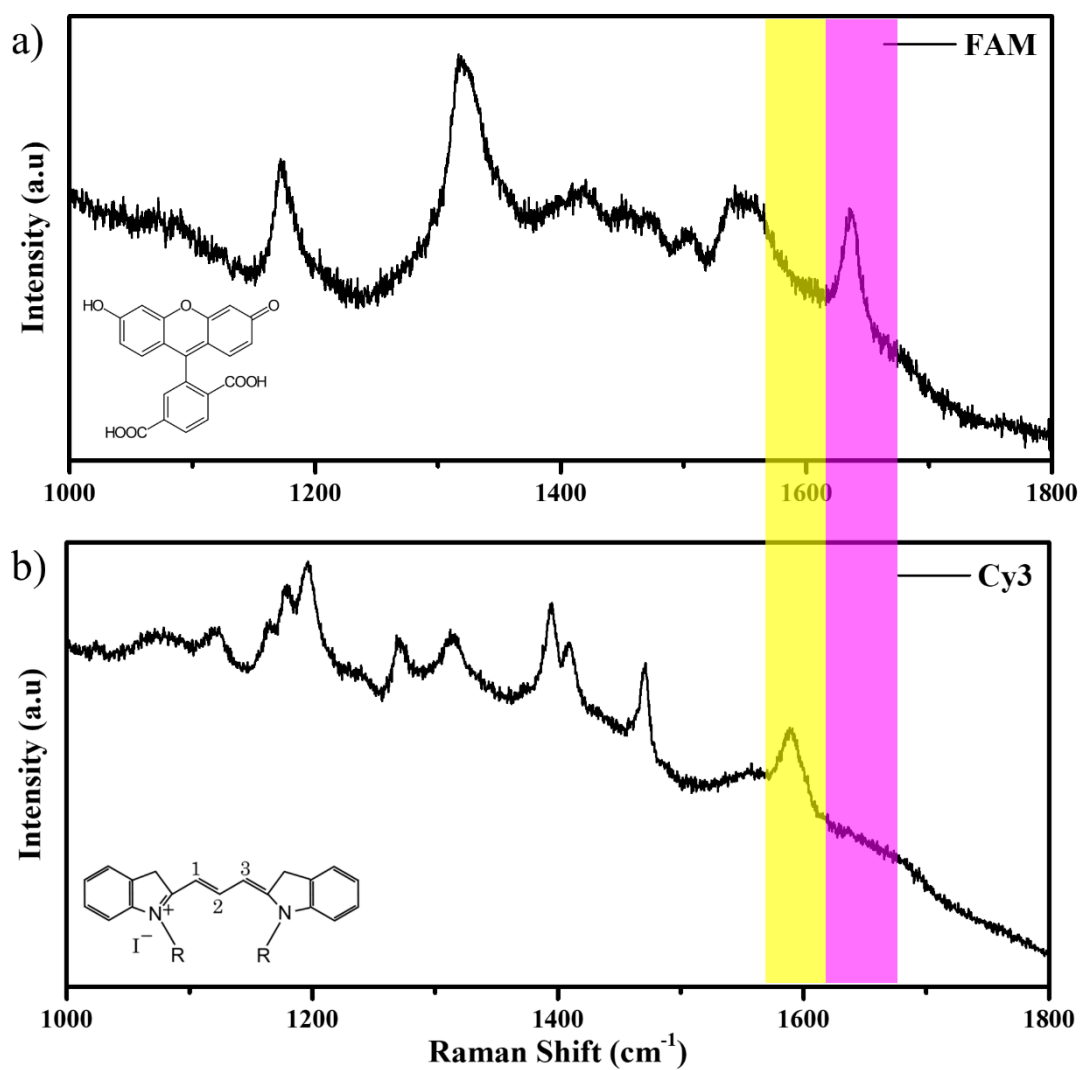

**Fig. S2.** Raman peaks in the SERS spectra corresponding to the a) FAM and the b) Cy3 dyes. The yellow highlighted region with a peak at  $1589\text{cm}^{-1}$  represents the unique peak corresponding to Cy3 and the pink highlighted region with a peak at  $1636\text{cm}^{-1}$  represents the unique peak corresponding to FAM.

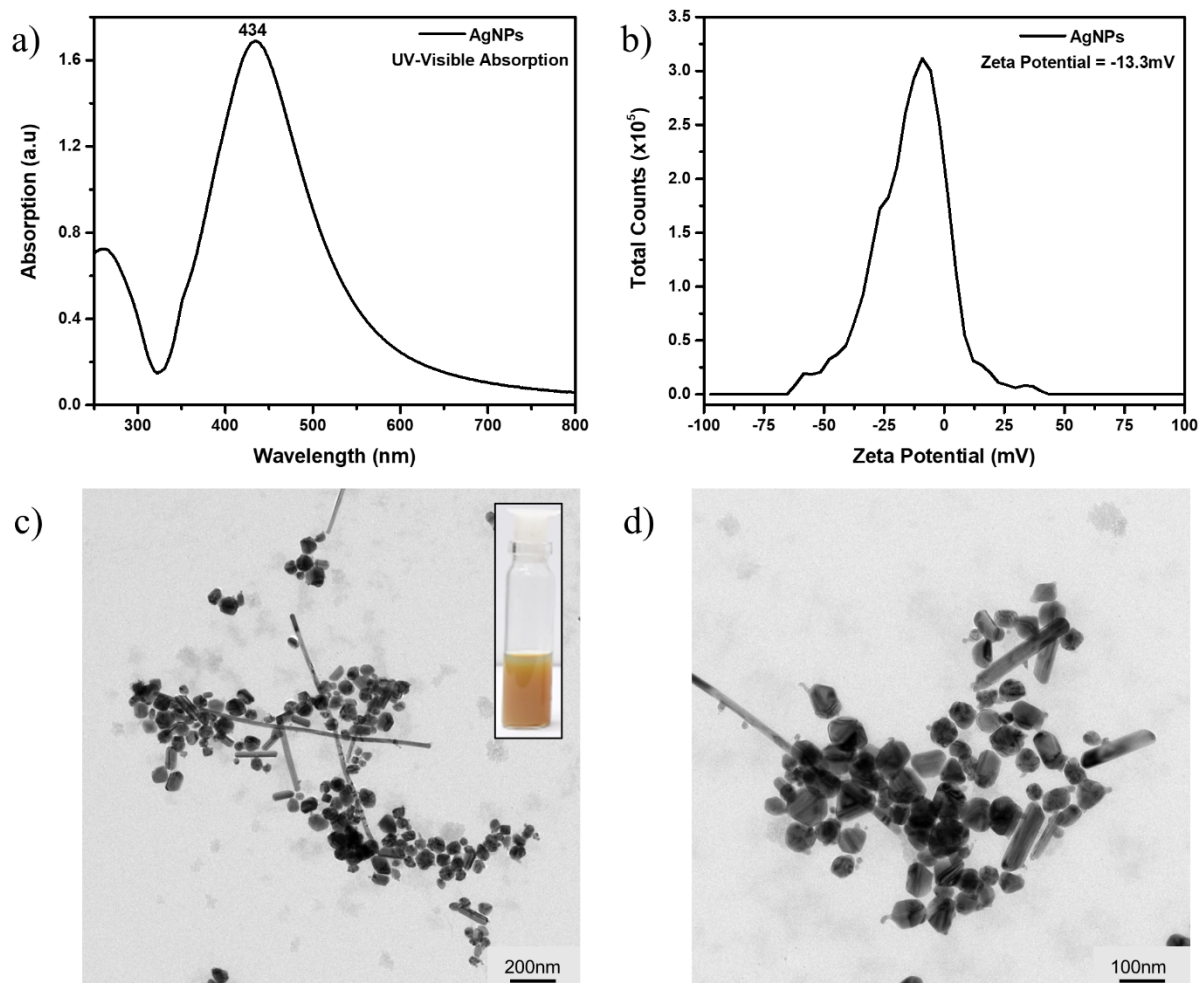

**Fig. S3.** a) UV-Visible absorption of the synthesized AgNPs, indicating a plasmon peak at 434 nm, b) Zeta Potential curve, with a zeta potential value of -13.3 mV, indicating negatively charge AgNPs, c) and d) TEM images of the synthesized AgNPs, Inset – the optical image of the AgNPs. The AgNPs are ranging from spherical to nano-rod-like structures.



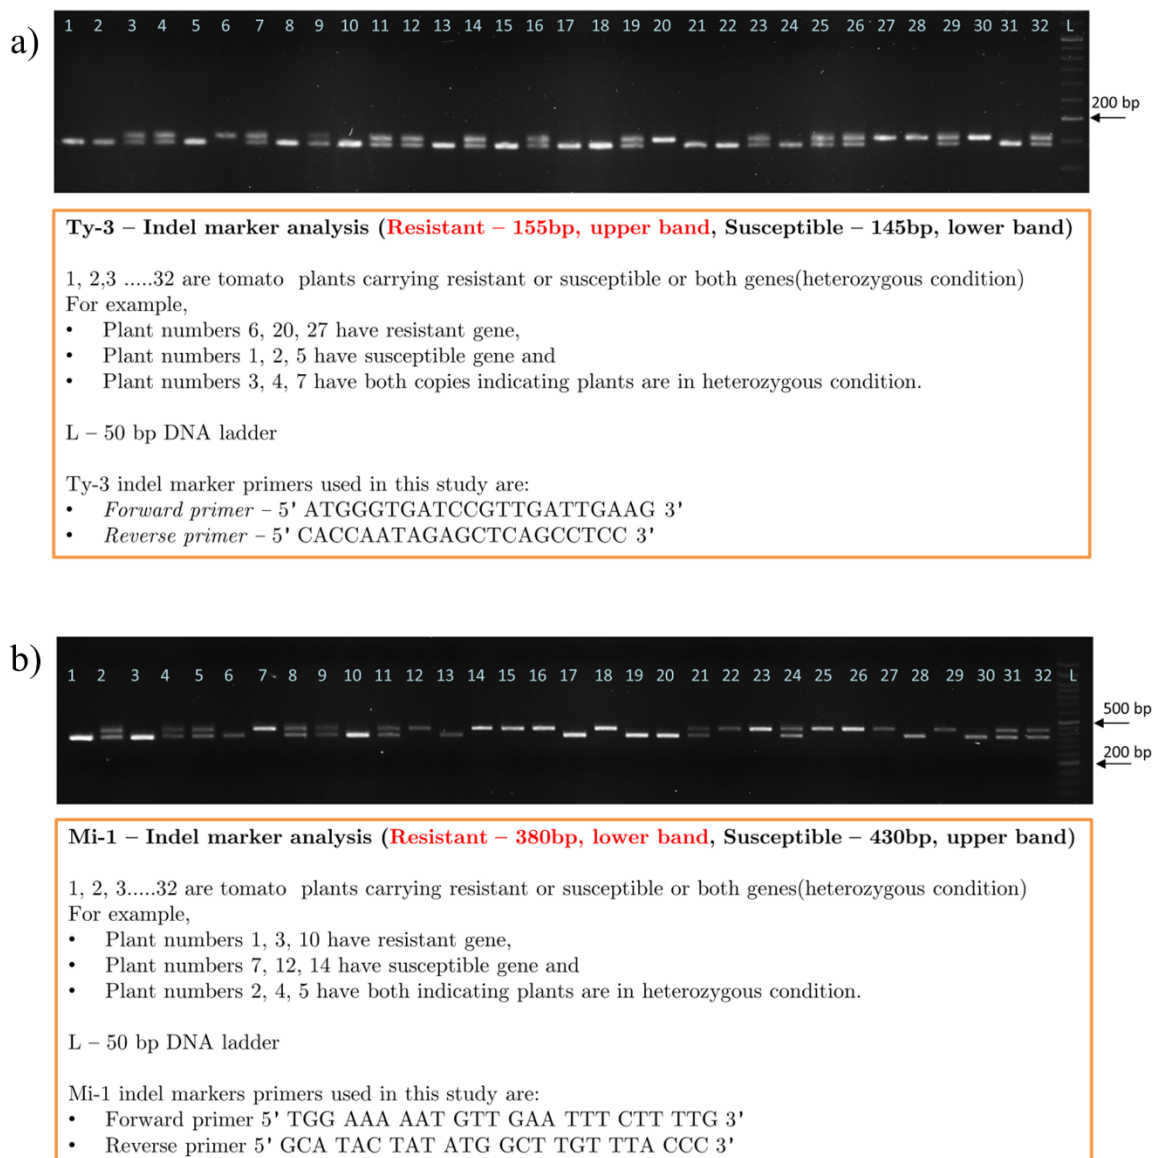

**Fig. S4.** Gel electrophoresis data representing the DNA of the susceptible and resistant plant varieties, in a) Ty3 and b) Mi1 gene

**Table S1.** Oligo sequences for Ty3 indel detection (iSp18 – hexaethylene glycol spacer)

| Type                                                                 | Sequence                                            |
|----------------------------------------------------------------------|-----------------------------------------------------|
| Forward primer specific to Insertion                                 | GTTTGATTACACCCCGTAAGATTGAAGAAATTGATGTTTCCTTCTTGTATA |
| Forward primer specific to Deletion                                  | TCCGCAACAGGACAGGTGGCGTTGATTGAAGAAATTGATGTTCTGGATG   |
| Reverse primer                                                       | GTTTTTGCCCCTGCTCCTTG                                |
| Probe for detection of the tail of insertion-specific forward primer | [6FAM]-TGCCCTTGTA-[iSp18]-TACAAGGGCACGTAGTTCAC      |
| Probe for detection of the tail of deletion-specific forward primer  | [Cy3]-GCTCACCCAC-[iSp18]-GTGGGTGAGCCTGTTACACC       |

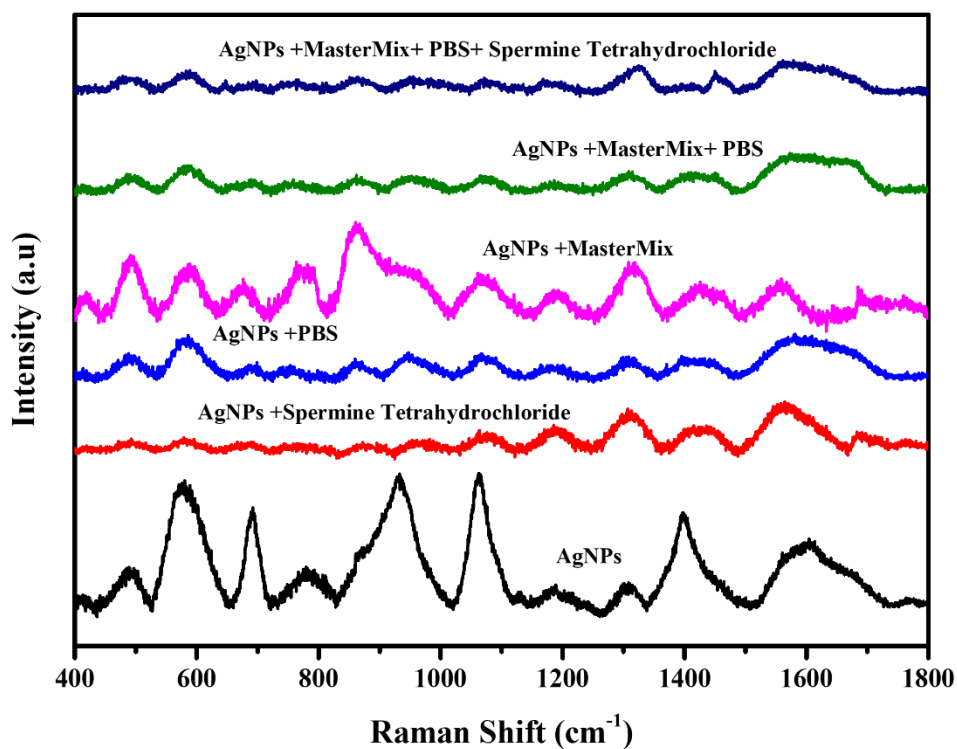

**Fig. S5.** Raman spectra of all the controls including AgNPs, mixtures of AgNPs with spermine tetrahydrochloride, PBS, Mastermix, Mastermix+PBS, and Mastermix+PBS+spermine tetrahydrochloride.

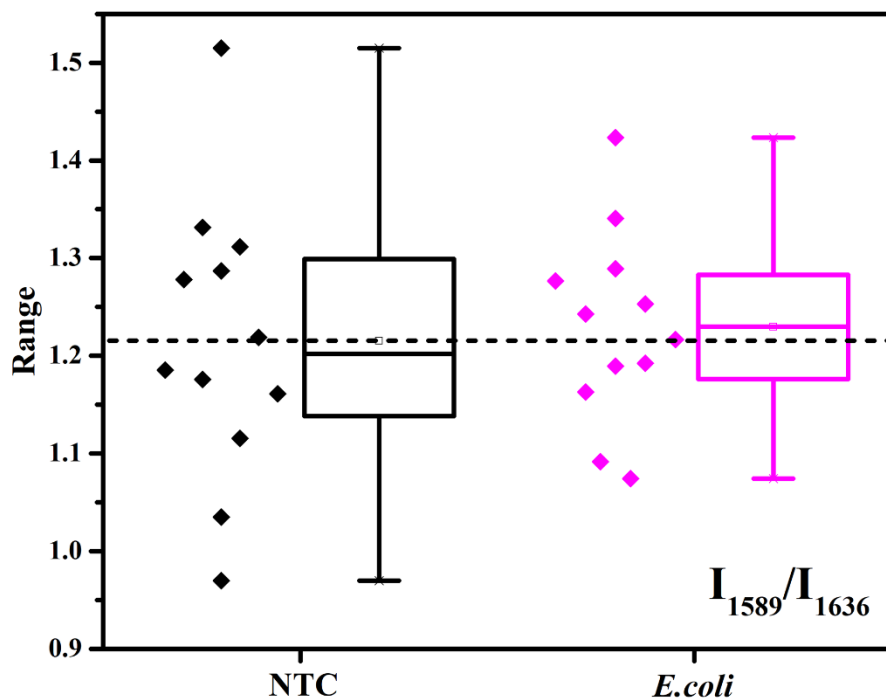

**Fig. S6.** Box plot corresponding to multiplexing studies of *E.coli* DNA

**Table S2.** Oligo sequences for Mi-1 indel detection

| Type                                                                 | Sequence                                       |
|----------------------------------------------------------------------|------------------------------------------------|
| Forward primer specific to Insertion                                 | CAACCTGGCGGGTATATTCAGGACGTGAACTGTCACATTTTC     |
| Forward primer specific to Deletion                                  | GAGGGTTAATCCCTCGGACTCAATTTGTTTGACACTTTCTCCGC   |
| Reverse primer                                                       | GTTTCTAAAATTTTGGAAATATTCTGGC                   |
| Probe for detection of the tail of insertion-specific forward primer | [6FAM]-CGCCAGGTTG-[iSp18]-CAACCTGGCGGGTATATTCA |
| Probe for detection of the tail of deletion-specific forward primer  | [Cy3]-ATTAACCCTC-[iSp18]-GAGGGTTAATCCCTCGGACT  |

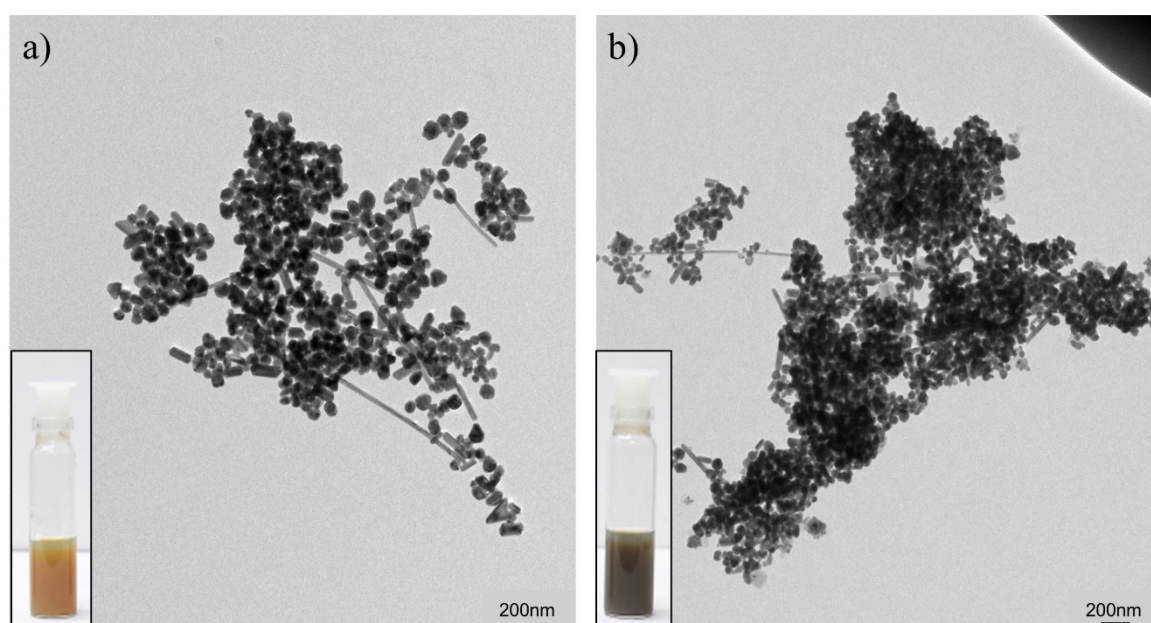

**Fig. S7.** TEM images of AgNPs with, a) 400 μM ST indicating aggregates in the size of 500-800 nm, and b) 0.01 M ST indicating aggregates in the size of 2-3 μm. Inset – optical image of the mixtures show, a) slight tinge of grey color of mixture, b) dark grey color of the mixture with 0.01 M ST.

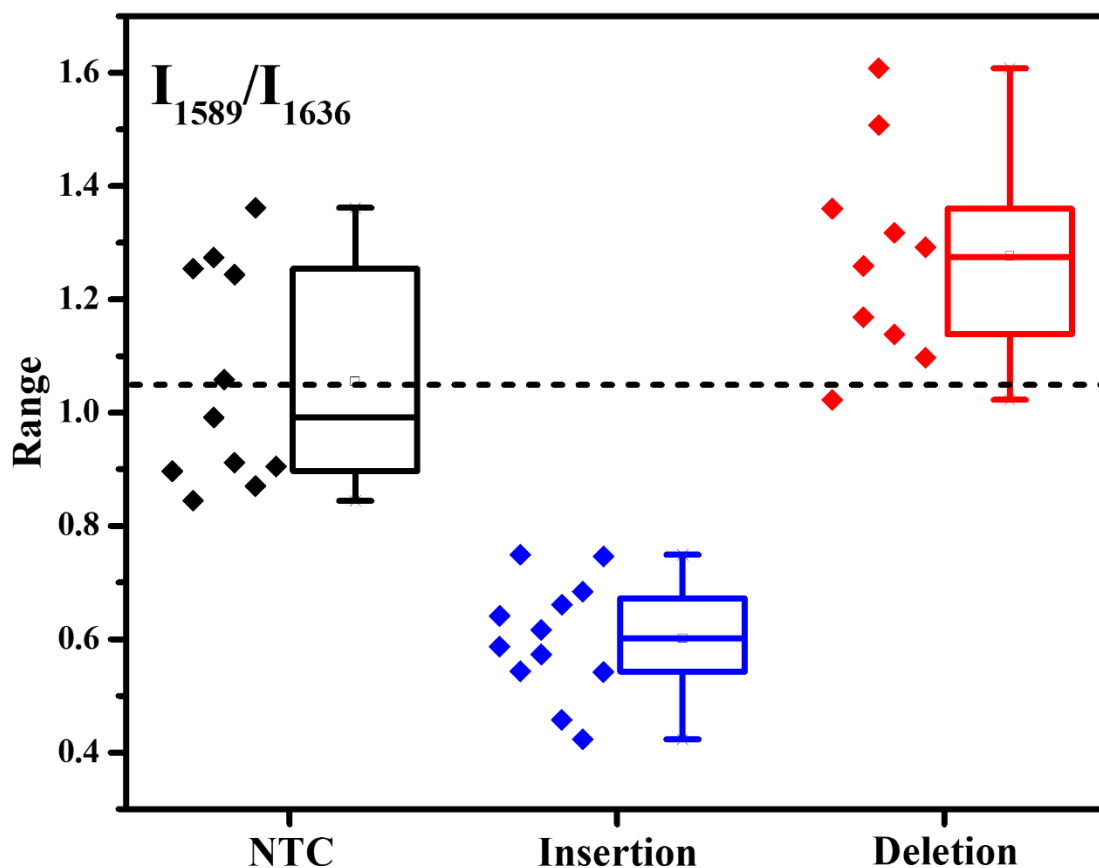

**Fig. S8.** Box plot for multiplexing SERS spectral analysis of the PCR products containing both FAM-tagged and Cy3-tagged probes using 0.01M ST – Intensity ratio of 1589 cm<sup>-1</sup> and 1636 cm<sup>-1</sup> peaks, blue – Resistant DNA (insertion indel), red – susceptible DNA (deletion indel)

**Table S3.** Oligo sequences for Ty3 SNP detection

| Type                                                                 | Sequence                                      |
|----------------------------------------------------------------------|-----------------------------------------------|
| Forward primer specific to Insertion                                 | CAACCTGGCGGGTATATTCAGGACGTGAACTGTCACATTTTC    |
| Forward primer specific to Deletion                                  | GAGGGTTAATCCCTCGGACTCAATTTGTTTGACACTTTTCTCCGC |
| Reverse primer                                                       | GTTTCTAAAATTTTGGAAATATTCTGGC                  |
| Probe for detection of the tail of insertion-specific forward primer | [6FAM]-CGCCAGTTG-[iSp18]-CAACCTGGCGGGTATATTC  |
| Probe for detection of the tail of deletion-specific forward primer  | [Cy3]-ATTAACCCTC-[iSp18]-GAGGGTTAATCCCTCGGACT |

**Table S4.** Comparison of existing techniques with SERS-based PCR assay

| Techniques:                           | Gel-based methods (RAPD, RFLP) | Sequencing methods (Sanger, pyrosequencing, Mini sequencing) | TaqMan™                              | Fluorescent molecular beacon         | PCR-based SERS detection                |
|---------------------------------------|--------------------------------|--------------------------------------------------------------|--------------------------------------|--------------------------------------|-----------------------------------------|
| <b>Features</b>                       |                                |                                                              |                                      |                                      |                                         |
| <b>Detection</b>                      | Endpoint                       | Real-time/Endpoint                                           | Real-time                            | Real-time                            | Endpoint                                |
| <b>Detection Platform</b>             | Fluorescence or Radioactive    | Fluorescence/ Luminometric etc.                              | Fluorescence                         | Fluorescence                         | Raman                                   |
| <b>Specialized Equipment required</b> | Electrophoresis chamber        | Colorimeter/ Pyro sequencer/ MALDI-TOF/ Flow cytometer etc.  | Fluorescence monitoring thermocycler | Fluorescence monitoring thermocycler | Normal thermocycler, Raman Spectrometer |
| <b>Multiplexing Ability</b>           | Moderate                       | -                                                            | Moderate                             | Moderate                             | High                                    |
| <b>Cost</b>                           | Low                            | High                                                         | Moderate                             | Moderate                             | Moderate                                |
| <b>Specificity</b>                    | Low                            | High                                                         | Moderate                             | Moderate                             | Moderate                                |
| <b>Time</b>                           | Time-consuming                 | Time-consuming                                               | Time saving                          | Time saving                          | Time saving                             |

**References:**

- Bernstein, E.; Caudy, A. A.; Hammond, S. M.; Hannon, G. J., Role for a bidentate ribonuclease in the initiation step of RNA interference. *Nature* **2001**, *409* (6818), 363-366.
- Verlaan, M. G.; Szinay, D.; Hutton, S. F.; de Jong, H.; Kormelink, R.; Visser, R. G. F.; Scott, J. W.; Bai, Y., Chromosomal rearrangements between tomato and *Solanum chilense* hamper mapping and breeding of the TYLCV resistance gene Ty-1. *The Plant Journal* **2011**, *68* (6), 1093-1103.
- Verlaan, M. G.; Hutton, S. F.; Ibrahim, R. M.; Kormelink, R.; Visser, R. G. F.; Scott, J. W.; Edwards, J. D.; Bai, Y., The Tomato Yellow Leaf Curl Virus Resistance Genes Ty-1 and Ty-3 Are Allelic and Code for DFDGD-Class RNA-Dependent RNA Polymerases. *PLOS Genetics* **2013**, *9* (3), e1003399.
